# Supplementary material
Source: publisher figshare collection journal article supplement (https://tandf.figshare.com/ndownloader/files/22652930)
Supplement: Supplementary file 1 [file 22652930]

**Supplementary Data to**  
**Protective effects of extracts of lichen *Dirinaria consimilis* (Stirton) D.D. Awasthi in**  
**bifenthrin- and diazinon-induced oxidative stress in rat erythrocytes *in vitro***

Vinay Bharadwaj Tatipamula<sup>a,b</sup> and Biljana Kukavica<sup>c,\*</sup>

<sup>a</sup>Institute of Research and Development, Duy Tan University, Da Nang 550000, Vietnam

<sup>b</sup>The Faculty of Pharmacy Duy Tan University, Da Nang 550000, Vietnam

<sup>c</sup>Faculty of Natural Sciences and Mathematics, University of Banja Luka, 2 Mladena Stojanovića St, 78000 Banja Luka, Bosnia and Herzegovina

**Corresponding author:** Email: [kukavicab@pmfbl.org](mailto:kukavicab@pmfbl.org)

**Results**

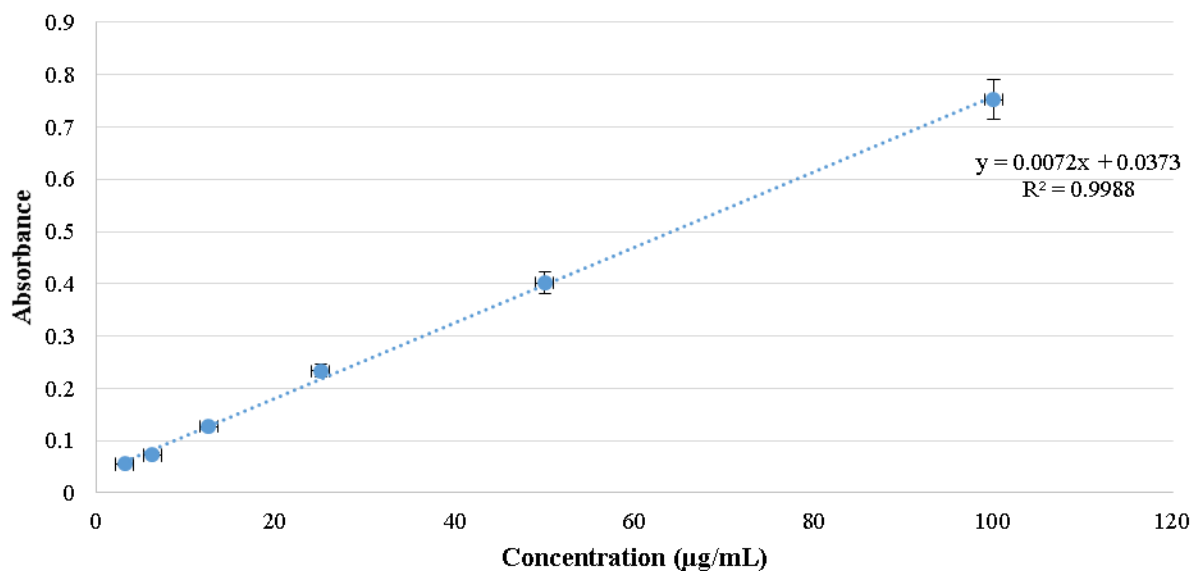

**Fig. S1:** Total flavonoid content for standard quercetin ( $R^2$ ,  $n=3$ )

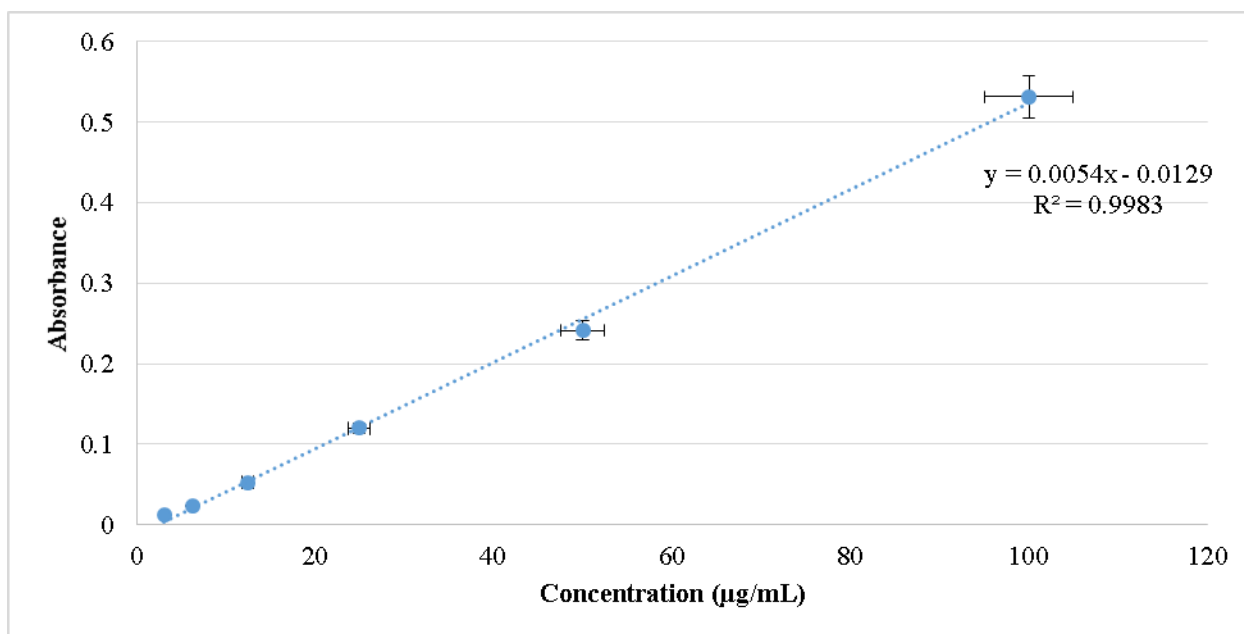

**Fig. S2:** Total phenolic content for standard gallic acid ( $R^2$ ,  $n=3$ )

**Table 1S:** Percentage inhibition of extracts of *Dirinaria consimilis* against DPPH, ABTS, and Superoxide free radicals

| Sample                  | Percentage of inhibition (%) at different concentrations |            |            |            |
|-------------------------|----------------------------------------------------------|------------|------------|------------|
|                         | 50 µg/mL                                                 | 100 µg/mL  | 150 µg/mL  | 200 µg/mL  |
| <b>DPPH assay</b>       |                                                          |            |            |            |
| <b>DA</b>               | 34.29±4.96                                               | 60.14±3.29 | 77.56±2.11 | 82.76±4.70 |
| <b>DM</b>               | 28.12±2.33                                               | 52.97±3.45 | 62.09±2.69 | 71.82±2.80 |
| <b>Ascorbic Acid*</b>   | 43.72±5.75                                               | 66.99±3.64 | 74.15±3.29 | 92.86±2.38 |
| <b>ABTS assay</b>       |                                                          |            |            |            |
| <b>DA</b>               | 34.33±1.74                                               | 55.12±2.10 | 72.94±4.38 | 89.54±2.75 |
| <b>DM</b>               | 31.80±1.85                                               | 58.31±1.48 | 69.17±2.39 | 76.83±4.01 |
| <b>Ascorbic Acid*</b>   | 44.11±2.33                                               | 64.28±2.15 | 76.48±3.46 | 89.35±0.15 |
| <b>Superoxide assay</b> |                                                          |            |            |            |
| <b>DA</b>               | 28.86±2.53                                               | 53.74±2.20 | 68.94±1.76 | 84.26±3.44 |
| <b>DM</b>               | 25.32±2.47                                               | 50.22±1.26 | 66.04±2.34 | 75.60±2.26 |
| <b>Ascorbic Acid*</b>   | 45.74±0.68                                               | 56.17±0.71 | 76.00±0.74 | 93.10±0.64 |

$n=3$ ; Mean±SD; \*25, 50, 75 and 100 µg/mL concentration

Table S2: Changes in the activities of the antioxidant enzymes in rats' erythrocytes of the treated groups in relation to control (expressed as a percentage).

| Groups        | Changes as a percentage of control |            |
|---------------|------------------------------------|------------|
|               | SOD                                | CAT        |
| Bifenthrin    | 39.81±1.24                         | 46.23±0.47 |
| Bifenthrin+DA | 12.94±0.44                         | 6.72±0.14  |
| Bifenthrin+DM | 24.06±1.41                         | 20.16±0.85 |
| Diazinon      | 44.44±1.41                         | 51.61±1.74 |
| Diazinon+DA   | 5.56±0.21                          | 1.88±0.31  |
| Diazinon+DM   | 6.47±0.21                          | 12.36±0.24 |

n = 3; mean ± SD
